# Supplementary material for: Weak intermolecular interactions and molecular aggregation in isostructural dihaloperfluoroethanes,
Source: Royal Society of Chemistry journal article supplement (doi:10.1039/b819942f), 2009-01-01
Supplement: b819942f.pdf [file b819942f.pdf]

## Supplementary Information: Weak intermolecular interactions and molecular aggregation in isostructural dihaloperfluoroethanes

Anna Olejniczak<sup>a</sup>, Andrzej Katrusiak<sup>a\*</sup> and Ashwani Vij<sup>b</sup>

<sup>a</sup>Faculty of Chemistry, Adam Mickiewicz University, Grunwaldzka 6, 60-780 Poznań, Poland.

<sup>b</sup>Edwards Air Force Base, 10 E. Saturn Blvd., Bldg. 8451, CA 93524, USA.

\*E-mail: katran@amu.edu.pl

**Table S1.** Crystal data and details of structure refinement for BrCF<sub>2</sub>CF<sub>2</sub>Br, CF<sub>2</sub>ICF<sub>2</sub>I and BrCF<sub>2</sub>CF<sub>2</sub>I

|                                                              | BrCF <sub>2</sub> CF <sub>2</sub> Br        | ICF <sub>2</sub> CF <sub>2</sub> I          | ICF <sub>2</sub> CF <sub>2</sub> I          | BrCF <sub>2</sub> CF <sub>2</sub> I         | BrCF <sub>2</sub> CF <sub>2</sub> I         | BrCF <sub>2</sub> CF <sub>2</sub> I         |            |
|--------------------------------------------------------------|---------------------------------------------|---------------------------------------------|---------------------------------------------|---------------------------------------------|---------------------------------------------|---------------------------------------------|------------|
| Pressure (GPa)                                               | 1.03(5)                                     | 0.16(5)                                     | 0.86(5)                                     | 0.60(5)                                     | 1.00(5)                                     | 3.50(5)                                     |            |
| Temperature (K)                                              | 296(2)                                      | 296(2)                                      | 296(2)                                      | 296(2)                                      | 296(2)                                      | 296(2)                                      |            |
| Formula weight                                               | 259.84                                      | 353.82                                      | 353.82                                      | 306.83                                      | 306.83                                      | 306.83                                      |            |
| Wavelength (Å)                                               | 0.71073                                     | 0.71073                                     | 0.71073                                     | 0.71073                                     | 0.71073                                     | 0.71073                                     |            |
| Crystal system                                               | Monoclinic                                  | Monoclinic                                  | Monoclinic                                  | Monoclinic                                  | Monoclinic                                  | Monoclinic                                  |            |
| Space group                                                  | P2 <sub>1</sub> /n                          |            |
| Unit cell dimensions (Å, °)                                  | a                                           | 5.768(1)                                    | 6.563(2)                                    | 6.4133(13)                                  | 6.1357(12)                                  | 5.9698(12)                                  | 5.7683(12) |
|                                                              | b                                           | 6.078(1)                                    | 6.293(4)                                    | 5.9350(12)                                  | 6.1449(12)                                  | 6.1503(12)                                  | 6.0823(12) |
|                                                              | c                                           | 8.080(1)                                    | 8.935(6)                                    | 8.4792(17)                                  | 8.3967(17)                                  | 8.2360(16)                                  | 8.0112(16) |
|                                                              | β                                           | 107.01(3)                                   | 106.47(5)                                   | 103.68(3)                                   | 108.30(3)                                   | 108.58(3)                                   | 109.92(3)  |
| Volume (Å <sup>3</sup> )                                     | 270.88(9)                                   | 353.8(3)                                    | 313.58(11)                                  | 300.57(10)                                  | 286.63(10)                                  | 264.26(9)                                   |            |
| Z                                                            | 2                                           | 2                                           | 2                                           | 2                                           | 2                                           | 2                                           |            |
| Calculated density (g/cm <sup>3</sup> )                      | 3.186                                       | 3.321                                       | 3.747                                       | 3.390                                       | 3.555                                       | 3.856                                       |            |
| Absorption coefficient (mm <sup>-1</sup> )                   | 14.936                                      | 8.868                                       | 10.006                                      | 11.950                                      | 12.531                                      | 13.592                                      |            |
| F(000)                                                       | 236                                         | 308                                         | 308                                         | 272                                         | 272                                         | 272                                         |            |
| Crystal diameter/height (mm)                                 | 0.36/0.07                                   | 0.39/0.07                                   | 0.46/0.06                                   | 0.41/0.09                                   | 0.37/0.09                                   | 0.36/0.08                                   |            |
| θ-range for data collection (°)                              | 4.27 to 29.53                               | 3.43 to 30.08                               | 3.60 to 28.63                               | 3.63 to 28.66                               | 3.71 to 29.39                               | 3.81 to 29.66                               |            |
| Min/max indices: h, k, l                                     | -6/6; -7/7; -7/8                            | -9/9, -5/5, -10/10                          | -8/8, -1/1, -11/11                          | -8/8, -8/8, -4/4                            | -8/8, -7/7, -8/8                            | -6/6, -7/7, -10/10                          |            |
| Reflect. Collected/unique (Rint)                             | 2085/342                                    | 2575/436                                    | 1107/197                                    | 2252/225                                    | 2216/362                                    | 1960/330                                    |            |
| Completeness (to θ <sub>max</sub> ) (%)                      | (0.0505)                                    | (0.0409)                                    | (0.1967)                                    | (0.0617)                                    | (0.0594)                                    | (0.0969)                                    |            |
|                                                              | 45.2                                        | 42                                          | 24.5                                        | 29.0                                        | 45.7                                        | 44.4                                        |            |
| Refinement method                                            | (to 29.53°)                                 | (to 30.08°)                                 | (to 28.63)                                  | (to 28.66)                                  | (to 29.39)                                  | (to 29.66)                                  |            |
|                                                              | Full-matrix least-squares on F <sup>2</sup> |            |
| Data/restraints/parameters                                   | 342/0/38                                    | 436/9/47                                    | 197/0/32                                    | 225/1/18                                    | 362/0/38                                    | 330/0/38                                    |            |
| Goodness-of-fit on F <sup>2</sup>                            | 1.139                                       | 1.238                                       | 1.429                                       | 1.082                                       | 1.192                                       | 1.171                                       |            |
| Final R <sub>1</sub> /wR <sub>2</sub> (I > 2σ <sub>1</sub> ) | 0.0495/0.1138                               | 0.0569/0.1304                               | 0.1302/0.3029                               | 0.1166/0.2670                               | 0.0618/0.1153                               | 0.0596/0.1762                               |            |
| R <sub>1</sub> /wR <sub>2</sub> (all data)                   | 0.0564/0.1180                               | 0.0844/0.1446                               | 0.1335/0.3107                               | 0.1240/0.2734                               | 0.0722/0.1234                               | 0.0692/0.1991                               |            |

|                                                     |                                                                                         |                                                                                         |                                                                                        |                                                                                       |                                                                                         |                                                                                         |
|-----------------------------------------------------|-----------------------------------------------------------------------------------------|-----------------------------------------------------------------------------------------|----------------------------------------------------------------------------------------|---------------------------------------------------------------------------------------|-----------------------------------------------------------------------------------------|-----------------------------------------------------------------------------------------|
| Weighting scheme                                    | $w=1/(\sigma^2(F_o2)+(0.0739 *P)^2+0.24 *P)$ , where $P=(\text{Max}(F_o2,0)+2 *F_c2)/3$ | $w=1/(\sigma^2(F_o2)+(0.0486 *P)^2+1.11 *P)$ , where $P=(\text{Max}(F_o2,0)+2 *F_c2)/3$ | $w=1/(\sigma^2(F_o2)+(0.000 *P)^2+1.11 *P)$ , where $P=(\text{Max}(F_o2,0)+2 *F_c2)/3$ | $w=1/(\sigma^2(F_o2)+(0.1087 *P)^2+12 *P)$ , where $P=(\text{Max}(F_o2,0)+2 *F_c2)/3$ | $w=1/(\sigma^2(F_o2)+(0.0455 *P)^2+2.48 *P)$ , where $P=(\text{Max}(F_o2,0)+2 *F_c2)/3$ | $w=1/(\sigma^2(F_o2)+(0.1199 *P)^2+2.30 *P)$ , where $P=(\text{Max}(F_o2,0)+2 *F_c2)/3$ |
| Largest diff. peak and hole ( $e.\text{\AA}^{-3}$ ) | 0.322/-0.443                                                                            | 0.408/-0.318                                                                            | 1.680/-1.373                                                                           | 0.825/-0.959                                                                          | 0.620/-0.575                                                                            | 1.438/-1.361                                                                            |
